# AORTA Gene: Polygenic prediction improves detection of thoracic aortic aneurysm

James P. Pirruccello MD<sup>1,2,3</sup>, Shaan Khurshid MD, MPH<sup>4,5,6,7</sup>, Honghuang Lin PhD<sup>8,9</sup>, Lu-Chen Weng PhD<sup>5,6</sup>, Siavash Zamirpour MS<sup>10</sup>, Shinwan Kany MD<sup>6,11</sup>, Avanthi Raghavan MD<sup>4,6</sup>, Satoshi Koyama MD, PhD<sup>5,6,12</sup>, Ramachandran S. Vasani MD<sup>8,13,14</sup>, Emelia J. Benjamin MD, ScM<sup>8,13,14</sup>, Mark E. Lindsay MD, PhD<sup>4,5,6,7,15</sup>, Patrick T. Ellinor MD, PhD<sup>4,5,6,7</sup>

1 Division of Cardiology, University of California San Francisco, San Francisco, California, USA, 2 Institute for Human Genetics, University of California San Francisco, San Francisco, California, USA, 3 Bakar Computational Health Sciences Institute, University of California San Francisco, San Francisco, California, USA, 4 Cardiology Division, Massachusetts General Hospital, Boston, Massachusetts, USA, 5 Cardiovascular Research Center, Massachusetts General Hospital, Boston, Massachusetts, USA, 6 Cardiovascular Disease Initiative, Broad Institute of MIT and Harvard, Cambridge, Massachusetts, USA, 7 Harvard Medical School, Boston, Massachusetts, USA, 8 Framingham Heart Study, Boston University and National Heart, Lung, and Blood Institute, Framingham, Massachusetts, USA, 9 Department of Medicine, University of Massachusetts Chan Medical School, Worcester, Massachusetts, USA, 10 School of Medicine, University of California San Francisco, San Francisco, California, USA, 11 Department of Cardiology, University Heart and Vascular Center Hamburg-Eppendorf, Hamburg, Germany, 12 Laboratory for Cardiovascular Genomics and Informatics, RIKEN Center for Integrative Medical Sciences, Kanagawa, Japan, 13 Department of Medicine, Cardiology and Preventive Medicine Sections, Boston Medical Center, Boston University Chobanian and Avedisian School of Medicine, Boston, Massachusetts, USA, 14 Epidemiology Department, Boston University School of Public Health, Boston, Massachusetts, USA, 15 Thoracic Aortic Center, Massachusetts General Hospital, Boston, Massachusetts, USA

**Running Title:** AORTA Gene

**Word Count:** 4,053

**Keywords:** Ascending aorta, polygenic score, UK Biobank, *All of Us*, Framingham Heart Study, Mass General Brigham

**Correspondence:**

James P. Pirruccello, MD  
University of California San Francisco  
Division of Cardiology  
555 Mission Bay Blvd South #3118  
San Francisco, CA 94158  
james.pirruccello@ucsf.edu

Patrick T. Ellinor, MD, PhD  
Massachusetts General Hospital  
Cardiology Division  
55 Fruit Street  
Boston, MA 02114  
ellinor@mgh.harvard.edu

## 42 Abstract

43 **Background:** Thoracic aortic disease is an important cause of morbidity and mortality in  
44 the US, and aortic diameter is a heritable contributor to risk. Could a polygenic  
45 prediction of ascending aortic diameter improve detection of aortic aneurysm?

46  
47 **Methods:** Deep learning was used to measure ascending thoracic aortic diameter in  
48 49,939 UK Biobank participants. A genome-wide association study (GWAS) was  
49 conducted in 39,524 participants and leveraged to build a 1.1 million-variant polygenic  
50 score with *PRScs-auto*. Aortic diameter prediction models were built with the polygenic  
51 score (“AORTA Gene”) and without it. The models were tested in a held-out set of 4,962  
52 UK Biobank participants and externally validated in 5,469 participants from Mass  
53 General Brigham Biobank (MGB), 1,298 from the Framingham Heart Study (FHS), and  
54 610 participants from *All of Us*.

55  
56 **Results:** In each test set, the AORTA Gene model explained more of the variance in  
57 thoracic aortic diameter compared to clinical factors alone: 39.9% (95% CI 37.8-42.0%)  
58 vs 29.2% (95% CI 27.1-31.4%) in UK Biobank, 36.5% (95% CI 34.4-38.5%) vs 32.5%  
59 (95% CI 30.4-34.5%) in MGB, 41.8% (95% CI 37.7-45.9%) vs 33.0% (95% CI 28.9-  
60 37.2%) in FHS, and 34.9% (95% CI 28.8-41.0%) vs 28.9% (95% CI 22.9-35.0%) in *All*  
61 *of Us*. AORTA Gene had a greater AUROC for identifying diameter  $\geq 4$ cm in each test  
62 set: 0.834 vs 0.765 ( $P=7.3E-10$ ) in UK Biobank, 0.808 vs 0.767 in MGB ( $P=4.5E-12$ ),  
63 0.856 vs 0.818 in FHS ( $P=8.5E-05$ ), and 0.827 vs 0.791 ( $P=7.8E-03$ ) in *All of Us*.

64

65 **Conclusions:** Genetic information improved estimation of thoracic aortic diameter when  
66 added to clinical risk factors. Larger and more diverse cohorts will be needed to develop  
67 more powerful and equitable scores.

68

69

## 70 Introduction

71 Thoracic aortic disease is an important cause of morbidity and mortality<sup>1,2</sup>. Ascending  
72 thoracic aortic enlargement is a well-established risk factor for ascending aortic  
73 dissection<sup>3,4</sup>. Indeed, the majority of dissections occur in individuals with aortic diameter  
74  $\geq 4$ cm, including more than 90% in the International Registry of Aortic Dissection and  
75 100% in Kaiser<sup>4,5</sup>. Contemporary guidelines do not describe a role for population  
76 screening of thoracic aortic aneurysm<sup>6</sup>, and universal imaging would likely be  
77 impractical.

78  
79 These limitations have spurred the development of clinical risk scores to identify  
80 individuals who are likely to have aortic enlargement on confirmatory imaging<sup>7-9</sup>. These  
81 scores have been shown to explain approximately 30% of the variance in ascending  
82 aortic diameter, with an area under the receiver operator characteristic curve (AUROC)  
83 near 0.78 for detecting individuals with diameter  $\geq 4$ cm. Population genetics studies  
84 suggest that ascending aortic diameter is highly heritable, with a proportion of variance  
85 attributable to common genetic factors of over 60%<sup>10</sup>. We therefore sought to assess  
86 whether incorporating polygenic risk might improve estimation of ascending aortic  
87 diameter over clinical factors alone.

88

## 89 Methods

### 90 Study design

91 Model development and internal validation were conducted in UK Biobank, with external  
92 validation within the *All of Us* cohort, the Mass General Brigham Biobank (MGB), and  
93 the Framingham Heart Study (FHS). This study was reported in accordance with the  
94 transparent reporting of a multivariable prediction model for individual prognosis or  
95 diagnosis (TRIPOD) statement<sup>11</sup>.

96  
97 Study protocols complied with the tenets of the Declaration of Helsinki. All UK Biobank  
98 participants provided written informed consent<sup>12</sup>, and only those participants who had  
99 not withdrawn consent as of March 7, 2023 were analyzed. The UK Biobank analyses  
100 were considered exempt by the UCSF Institutional Review Board (IRB), #22-37715. UK  
101 Biobank analyses were conducted under application #41664. Each *All of Us* biobank  
102 participant provided written informed consent<sup>13</sup>. The *All of Us* analyses were considered  
103 exempt by the UCSF IRB, #22-37715. The MGB study protocols were approved with a  
104 waiver of informed consent by the Mass General Brigham IRB. All FHS participants  
105 provided written informed consent, and the FHS imaging analyses were previously  
106 approved by the IRB of the Boston University Medical Center<sup>14</sup>. The FHS analyses were  
107 also approved by the MGB IRB.

### 108 Study populations

109 In UK Biobank participants, ascending aortic diameter was measured from magnetic  
110 resonance imaging (MRI) using a previously described deep learning model<sup>15</sup>. Model

111 development and internal validation were conducted in UK Biobank. External validation  
112 of the models was pursued in MGB participants with ascending aortic diameter  
113 measured from TTE for clinical indications<sup>16</sup>; in FHS participants with ascending aortic  
114 diameter measured for research purposes from non-contrast computed tomography  
115 (CT)<sup>14</sup>; and in *All of Us* biobank participants who had clinical aortic diameter  
116 measurements from transthoracic echocardiography (TTE)<sup>13</sup>. In MGB, race or ethnicity  
117 was extracted from the electronic health record<sup>16</sup> and the validation analyses were  
118 repeated in individuals identified as Black.

### 119 **Modality-specific differences**

120 The clinical approach to measuring ascending aortic diameter differs by modality. UK  
121 Biobank MRI-based aortic diameter measurements were derived from the blood pool  
122 diameter only, incorporating neither aortic wall. For TTE, used in the MGB and *All of Us*  
123 cohorts, standard measurements use the “leading edge to leading edge” approach,  
124 incorporating one wall. For non-contrast CT measurements, used in FHS, both walls are  
125 incorporated into the diameter.

### 126 **Splitting the UK Biobank for training and validation**

127 49,939 UK Biobank participants with MRI measurements of aortic diameter were  
128 randomly assigned a number from 0-999. Those from 0-799 contributed to the genome-  
129 wide association study (GWAS) used to produce the polygenic score (N=39,524). Those  
130 from 800-999 related within 3 degrees of kinship to the 0-799 group were excluded to  
131 avoid polygenic score overfitting (N=557). Those remaining from 0-899 contributed to  
132 the development of non-genetic models (N=44,420). Those from 800-899 were included

133 in the derivation of weights for the polygenic score component of the AORTA Gene  
134 combined clinical and genetic model (N=4,896). Those  $\geq 900$  were analyzed for  
135 validation (N=4,962; **Figure 1**).

### 136 **Thoracic aortic aneurysm in *All of Us***

137 Within *All of Us*, thoracic aortic aneurysm was defined as the first occurrence of  
138 SNOMED codes 433068007, 74883004, or 426948001; ICD10CM codes of I71.01,  
139 I71.1, I71.2, or I77.810; ICD9CM codes of 441.01, 441.1, 441.2, or 447.71; ICD10PCS  
140 codes of 02RX0JZ or 02RW0JZ; the ICD9Proc code 39.73; or CPT4 codes 33863,  
141 75957, 33880, 75956, or 33881. Prevalent analyses were conducted based on the  
142 presence of disease labels prior to the time of enrollment. Time-to-event analyses were  
143 conducted beginning at the time of enrollment and censored on July 1, 2022 using the R  
144 *survival* package, excluding participants whose diagnoses occurred prior to enrollment.  
145 Any tabular data with an *All of Us* sample count  $< 20$  was modified in accordance with *All*  
146 *of Us* policies.

### 147 **Genome-wide association study and polygenic scores**

148 Common genetic contributions to ascending aortic diameter in the 39,524 GWAS  
149 participants were discovered using REGENIE v3.2.7<sup>17</sup> with imputed variants provided by  
150 UK Biobank<sup>18,19</sup>. GWAS covariates included age, age<sup>2</sup>, sex, the MRI serial number, the  
151 genotyping array, and the first ten principal components of ancestry. The summary  
152 statistics were trimmed to the  $\sim 1.1$  million UK Biobank-specific variants within HapMap3  
153 identified by the *PRSCs* authors, and underwent Bayesian weighting by *PRSCs-auto* on  
154 its default settings to produce polygenic score weights<sup>20</sup>.

155

156 The polygenic score was applied to all UK Biobank participants with imputed genetic  
157 data<sup>19</sup>. Variants with imputation quality <0.3 were removed.

158

159 The polygenic score was applied to all MGB participants with imputed genetic data<sup>16,21</sup>  
160 with imputation into the TOPMed panel<sup>22</sup>.

161

162 The polygenic score was applied to FHS participants with CT and genetic data  
163 available. For FHS, genotyping was done on the Affymetrix GeneChip 500K Array Set &  
164 50K Human Gene Focused Panel (Affymetrix, Santa Clara, CA, USA). Variants with call  
165 rate <97% or Hardy–Weinberg equilibrium  $P < 1E-06$  were excluded. The remaining  
166 variants were then imputed to the 1000 Genomes Project phase I release 3 panel by  
167 MACH version 1.0<sup>23,24</sup>. Variants with imputation quality <0.3 were removed.

168

169 The polygenic score was applied to *All of Us* participants with whole genome  
170 sequencing data available in release “R7”<sup>25</sup>.

171

172 Within each set of participants, the polygenic score was residualized for the first 20  
173 principal components of ancestry (except for FHS, where 10 were used due to  
174 availability). The polygenic score in each group was zero-centered and scaled by the  
175 standard deviation from the UK Biobank training set: for studies that applied the  
176 average polygenic score (UK Biobank, *All of Us*) the standard deviation was 3.4E-07,



177 and for those that applied the summed polygenic score (MGB, FHS) the standard  
178 deviation was 0.38.

## 179 **Ascending aortic diameter model training**

180 Hierarchical group least absolute shrinkage and selection operator models were built to  
181 estimate ascending aortic diameter using the R package *glinternet*<sup>26</sup>. Three models  
182 were constructed with *glinternet* v1.0.11 using the following independent variables: (a)  
183 age, age<sup>2</sup>, and sex; (b) age, age<sup>2</sup>, sex, and polygenic score; (c) age, age<sup>2</sup>, body mass  
184 index (BMI), heart rate, systolic and diastolic blood pressure, height, weight, sex, and a  
185 history of diabetes, hypertension, or hyperlipidemia. A fourth model (d) was constructed  
186 by taking a linear combination of the model (c) and the polygenic score. The weighting  
187 for model (c) was estimated in all participants randomly assigned to 0-899, while the  
188 weighting for model (b) and the linear combination for model (d) were estimated in those  
189 assigned to 800-899 to avoid overlap with the GWAS cohort. For ease of reference, we  
190 label model (c) “AORTA Score” (AORTA: optimized regression for thoracic aneurysm)  
191 and model (d) “AORTA Gene”.

## 192 **Statistical analysis**

193 All statistical significance tests were two-sided, with significance defined as  $P < 0.05$ ,  
194 and performed in R 4.2.3 unless otherwise stated. For visualization, scores were plotted  
195 against measured thoracic aortic diameter.

## 196 Outcomes

197 The primary outcome was correlation between the scores and ascending aortic  
198 diameter using linear models, expressed as  $R^2$  (variance explained). Secondary  
199 outcomes included tests of calibration, and the performance of the scores for identifying  
200 ascending aortic diameter  $\geq 4.0$ cm; the clinical diagnosis of aneurysm was also tested in  
201 *All of Us*.

202  
203 To assess calibration, each score was used as an independent variable in a linear  
204 model predicting aortic diameter that also had an intercept, permitting significance  
205 testing of both the slope and the intercept. Mean absolute error was also computed.

206  
207 To assess the performance for identifying diameter  $\geq 4$ cm, the AUROC was computed.  
208 Confusion matrices and their derived statistical measures were produced based on the  
209 presence or absence of aortic diameter  $\geq 4$ cm and the presence or absence of predicted  
210 diameters above a fixed threshold determined in the training set for each score. The  
211 thresholds for the confusion matrix analysis were defined in the 4,896 participants in the  
212 training set.

213  
214 AUROCs were compared using the DeLong test<sup>27</sup>. The continuous net reclassification  
215 index (NRI) was calculated following the formula of Pencina, *et al*<sup>28</sup>.

## 216 **Data and code availability**

217 Computed scores are returned to UK Biobank, where data are made available by UK  
218 Biobank to researchers from research institutions with genuine research inquiries,

219 following IRB and UK Biobank approval. FHS data are made available to researchers  
220 with approved research applications. The dbGAP study accession number used for FHS  
221 validation was #phv00076329.v1.p5 for ascending aortic diameter. MGB data are  
222 available to MGB investigators; external collaboration requests can be initiated through  
223 <https://biobank.massgeneralbrigham.org/for-researchers>. The complete set of AORTA  
224 Score covariates and their weights are available as R programs at  
225 [github.com/carbocation/genomisc](https://github.com/carbocation/genomisc) and the polygenic score weights will be available on  
226 the Polygenic Score Catalog ( [pgscatalog.org](https://pgscatalog.org) ).

## 227 Results

### 228 Clinical characteristics

229 Among the 4,896 UK Biobank participants whose data contributed to training the  
230 genetic models, 2,489 were women and 2,407 were men. The ascending aortic  
231 diameter was  $3.05 \pm 0.31$ cm for women and  $3.34 \pm 0.34$ cm for men. The 4,962 internal  
232 validation set participants had similar measurements (**Table 1; Figure 1**). The MGB  
233 validation set consisted of 5,469 participants with genetic data and aortic diameter  
234 measured from TTE. The FHS validation set consisted of 1,298 participants with genetic  
235 data and aortic diameter measured from non-contrast CT. The *All of Us* validation set  
236 consisted of 610 participants 40 years and older with genetic data and aortic diameter  
237 measured from TTE; 60% identified as female and 88% as having non-Hispanic white  
238 ethnicity.

### 239 Model validation for aortic diameter

240 Testing calibration, the slope of the AORTA Gene model was statistically consistent with  
241 one in UK Biobank ( $P=0.2$ ), MGB ( $P=1.0$ ), FHS ( $P=0.6$ ), and *All of Us* ( $P=0.4$ ) (**Figure**  
242 **2**). The intercept was consistent with zero in UK Biobank ( $P=0.2$ ), MGB ( $P=0.4$ ), and *All*  
243 *of Us* ( $P=0.8$ ), but not FHS (intercept estimate 0.26cm,  $P=0.01$ ). The same pattern was  
244 observed for the clinical AORTA Score. In contrast, the model incorporating only age,  
245 sex, and the polygenic score had a calibration slope inconsistent with one in most  
246 cohorts outside of UK Biobank (**eTable AA**).

247

248 The AORTA Gene model's mean absolute error (MAE) for ascending aortic diameter  
249 was 0.212cm (95% CI 0.207-0.217cm) in UK Biobank, 0.282cm (95% CI 0.275-  
250 0.289cm) in MGB, 0.344cm (95% CI 0.331-0.358cm) in FHS, and 0.293cm (95% CI  
251 0.273-0.313cm) in *All of Us*. The clinical AORTA Score had an inferior MAE in all  
252 cohorts: 0.232cm (95% CI 0.227-0.237cm) in UK Biobank, 0.291cm (95% CI 0.284-  
253 0.298cm) in MGB, 0.351cm (95% CI 0.337-0.365cm) in FHS, and 0.306cm (95% CI  
254 0.285-0.327cm) in *All of Us*. The age/sex/genetics model had an MAE of 0.226cm (95%  
255 CI 0.221-0.231cm) in UK Biobank, 0.293cm (95% CI 0.286-0.300cm) in MGB, 0.346cm  
256 (95% CI 0.332-0.360cm) in FHS, and 0.318cm (95% CI 0.296-0.340) in *All of Us*.

257  
258 The AORTA Gene model explained 39.9% of the variance in ascending aortic diameter  
259 (99% CI 37.8-42.0%;  $P=2.6E-551$ ) in the UK Biobank validation set, 36.5% (95% CI  
260 34.4-38.5%,  $P=2.4E-541$ ) in MGB, 41.8% (95% CI 37.7-45.9%;  $P=3.5E-154$ ) in FHS,  
261 and 34.9% (95% CI 28.8-41.0%;  $P=1E-58$ ) in *All of Us* (**Figure 3**). In comparison, the  
262 clinical AORTA Score explained 29.3% of the variance in UK Biobank (99% CI 27.1-  
263 31.4%), 32.5% in MGB (95% CI 30.4-34.5%), 33.0% (95% CI 28.9-37.2%) in FHS, and  
264 28.9% (95% CI 22.9-35.0%) in *All of Us*. The age/sex/genetics model explained 31.8%  
265 (95% CI 29.6-33.9%) of variance in UK Biobank, 33.2% (95% CI 31.2-35.3%) in MGB,  
266 33.3% (95% CI 29.1-37.5%) in FHS, and 31.0% (95% CI 24.9-37.1%) in *All of Us*.

267

## 268 **Model validation for a 4cm aortic diameter threshold**

269 113 of the 4,962 internal validation set participants in UK Biobank had aortic diameter  
270  $\geq 4$ cm (2.3%), as did 335 of 5,469 MGB participants (6.1%), 116 of 1,298 FHS  
271 participants (8.9%), and 65 of 610 *All of Us* participants (10.7%).

272  
273 The AUROC for detecting diameter  $\geq 4$ cm for the AORTA Gene model was 0.834 (95%  
274 CI 0.798-0.869) in UK Biobank, 0.808 (95% CI 0.783-0.832) in MGB, 0.856 (95% CI  
275 0.821-0.891) in FHS, and 0.827 (95% CI 0.776-0.878) in *All of Us* (**Figure 4; eTable**  
276 **BB**).

277  
278 For the clinical AORTA Score, the AUROC was 0.765 (95% CI 0.723-0.807) in UK  
279 Biobank, 0.767 (95% CI 0.741-0.792) in MGB, 0.818 (95% CI 0.776-0.859) in FHS, and  
280 0.791 (95% CI 0.735-0.846) for *All of Us*. The AUROC of AORTA Gene was  
281 significantly greater in all cohorts:  $P=7.3E-10$  against a null hypothesis of no difference  
282 in UK Biobank,  $P=4.5E-12$  in MGB,  $P=8.5E-05$  in FHS, and  $P=7.8E-03$  in *All of Us*  
283 (**eTable CC**).

284  
285 The age/sex/genetics model had an AUROC of 0.805 (95% CI 0.767-0.843) in UK  
286 Biobank, 0.805 (95% CI 0.781-0.829) in MGB, 0.819 (95% CI 0.781-0.856) in FHS, and  
287 0.813 (95% CI 0.757-0.870) in *All of Us*. The AORTA Gene AUROC was significantly  
288 greater in UK Biobank ( $P=0.03$ ) and FHS ( $P=3.9E-03$ ), but not in MGB ( $P=0.7$ ) or *All of*  
289 *Us* ( $P=0.5$ ) (**eTable CC**).

290

291 The continuous NRI was positive for AORTA Gene over the clinical AORTA Score and  
292 the age/sex/genetics model in all cohorts (**eTable CC**). Decomposed into its NRI(event)  
293 and NRI(nonevent) components, AORTA Gene had a greater NRI(event) in all cohorts  
294 compared to the AORTA Score and the age/sex/genetics model. However, its  
295 NRI(nonevent) value was lower than that of the AORTA Score in MGB and UK Biobank,  
296 and lower than that of the age/sex/genetics model in MGB and *All of Us*.

### 297 **Score threshold demonstrations**

298 To evaluate the consequences of various score thresholds whereby a portion of the  
299 population could be brought forward for confirmatory thoracic imaging, two thresholds  
300 were defined within the UK Biobank training set and applied in the validation sets: one  
301 targeted at the top 10% of the population, and the other designed to have a sensitivity of  
302 90% for aortic diameter  $\geq 4\text{cm}$  (**eTable BB**).

303  
304 For the target top 10% AORTA Gene cutoff, 485 (9.8%) of 4,962 participants were  
305 above this threshold in UK Biobank, 640 (11.7%) of 5,469 in MGB, 99 (7.6%) of 1,295 in  
306 FHS, and 97 (15.9%) of 610 in *All of Us*. 59 of 113 UK Biobank participants with  
307 diameter  $\geq 4\text{cm}$  were correctly classified as enlarged (sensitivity 52.2%), as were 162 of  
308 335 in MGB (48.4%), 47 of 116 in FHS (40.5%), and 35 of 65 in *All of Us* (53.8%). The  
309 precision was 0.122 in UK Biobank, 0.253 in MGB, 0.475 in FHS, and 0.361 in *All of Us*,  
310 yielding respective F1 scores of 0.197, 0.332, 0.437, and 0.432 (**eTable BB**). A  
311 comparable threshold for the clinical AORTA Score flagged 484 (9.8%) of 4,962 UK  
312 Biobank participants, 722 (13.2%) of 5,469 in MGB, 92 (7.1%) of 1,295 in FHS, and 110  
313 (18.0%) of 610 in *All of Us*. 41 of 113 UK Biobank participants with diameter  $\geq 4\text{cm}$  were

314 correctly classified as enlarged (sensitivity 36.3%) as were 143 of 335 in MGB (42.7%),  
315 38 of 116 in FHS (32.8%), and 33 of 65 in *All of Us* (50.8%). The precision was 0.85 in  
316 UK Biobank, 0.198 in MGB, 0.413 in FHS, and 0.300 in *All of Us*, yielding respective F1  
317 scores of 0.137, 0.271, 0.365, and 0.377 (**eTable BB**).

318  
319 For the target 90% sensitive AORTA Gene cutoff, 1,737 (35.0%) of 4,962 UK Biobank  
320 participants were above this threshold, 1,943 (35.5%) of 5,469 in MGB, 336 (25.9%) of  
321 1,295 in FHS, and 247 (40.5%) of 610 in *All of Us*. 92 of 113 UK Biobank participants  
322 with diameter  $\geq 4$ cm were correctly classified as enlarged (sensitivity 81.4%), as were  
323 258 of 335 in MGB (77.0%), 88 of 116 in FHS (75.9%), and 56 of 65 in *All of Us*  
324 (86.2%). The precision was 0.053 in UK Biobank, 0.133 in MGB, 0.262 in FHS, and  
325 0.227 in *All of Us*, yielding respective F1 scores of 0.099, 0.227, 0.389, and 0.359  
326 (**eTable DD**). A comparable threshold for the clinical AORTA Score flagged 2,006  
327 (40.4%) of 4,962 UK Biobank participants, 2,194 (40.1%) of 5,469 in MGB, 405 (31.3%)  
328 of 1,295 in FHS, and 266 (43.6%) of 610 in *All of Us*. 87 of 113 UK Biobank participants  
329 with diameter  $\geq 4$ cm were correctly classified as enlarged (sensitivity 77.0%), as were  
330 264 of 335 in MGB (78.8%), 86 of 116 in FHS (74.1%), and 52 of 65 in *All of Us*  
331 (80.0%). The precision was 0.043 in UK Biobank, 0.120 in MGB, 0.212 in FHS, and  
332 0.195 in *All of Us*, yielding respective F1 scores of 0.082, 0.209, 0.330, and 0.314  
333 (**eTable DD**).

### 334 **Thoracic aortic aneurysm diagnosis in *All of Us***

335 In the 164,789 *All of Us* participants aged 40 or older with genetic data, 1,904 had an  
336 electronic health record (EHR)-based diagnosis of thoracic aortic aneurysm prior to



337 enrollment. AORTA Gene's AUROC was 0.760 (95% CI 0.750-0.771) compared to  
338 0.739 (95% CI 0.728-0.750) for the AORTA Score (**eTable EE**),  $P=2.4E-16$  against a  
339 null hypothesis of no difference (**eTable FF**). For incident disease (1,632 cases  
340 diagnosed after enrollment), AORTA Gene's AUROC was 0.748 (95% CI 0.737-0.759)  
341 compared to 0.729 (95% CI 0.718-0.741) for the AORTA Score,  $P=9.5E-10$  against a  
342 null hypothesis of no difference (**eTables EE-FF**).

### 343 **Analysis in Black individuals in MGB**

344 In MGB, 340 individuals were identified as Black through the electronic health record<sup>16</sup>.  
345 In these individuals, AORTA Gene had an intercept consistent with zero ( $P=0.5$ ) and a  
346 slope consistent with one ( $P=0.5$ ). The MAE was 0.297cm (95% CI 0.272-0.321cm),  
347 and the model explained 34.8% of variance in ascending aortic diameter (95% CI 26.7-  
348 43.0%). In comparison, for the clinical AORTA Score these values were 0.294cm (95%  
349 CI 0.269-0.319cm) and 34.3% (95% CI 26.2-42.5%) (**eTable AA**). The AUROC for  
350 detecting diameter  $\geq 4$ cm for the AORTA Gene model was 0.858 (**eTable BB**), nominally  
351 greater than that of the clinical AORTA Score (AUROC 0.820,  $P=0.04$  for the difference,  
352 **eTable CC**), with a positive continuous NRI (0.473).

353

## 354 Discussion

355 Ascending thoracic aortic diameter has a SNP heritability estimated to be greater than  
356 60%<sup>10</sup>, which makes the incorporation of common-variant genetic data for the  
357 presymptomatic detection of individuals with aortic enlargement or aneurysm  
358 conceptually appealing. But whether aortic polygenic scores encode information not  
359 already latently captured through correlation with clinical covariates was unknown.  
360 Here, we observed that AORTA Gene, which incorporated both an aortic polygenic  
361 score and clinical covariates, improved estimation of ascending aortic diameter and  
362 identification of individuals with diameter  $\geq 4$ cm in four cohorts—UK Biobank, MGB,  
363 FHS, and *All of Us*—when compared to a previously validated model for aortic diameter  
364 built from the same clinical covariates.

365  
366 For the estimation of aortic diameter as a quantitative measure, a clinical model built  
367 from the same covariates as the AORTA Score<sup>9</sup> explained 29.3% of the variance in  
368 ascending aortic diameter in UK Biobank, 28.9% in *All of Us*, 32.5% in MGB, and 33.0%  
369 in FHS. The AORTA Gene model that additionally incorporated the aortic diameter  
370 polygenic score increased those values to 39.9% in UK Biobank, 34.9% in *All of Us*,  
371 36.5% in MGB, and 41.8% in FHS. These represent a 10.6% absolute improvement in  
372 explained variance (36% relative improvement) in UK Biobank, 4% (12.3% relative  
373 improvement) in MGB, 8.8% (27% relative improvement) in FHS, and 6% (21% relative  
374 improvement) in *All of Us*. These substantive improvements from the polygenic score  
375 over a clinical model are comparable in magnitude to the addition of key clinical  
376 predictors over age and sex alone<sup>9</sup>.

377  
378 Incorporation of the polygenic score also improved identification of individuals with  
379 clinically relevant aortic enlargement (i.e., diameter  $\geq 4$ cm). The clinical model had an  
380 AUROC of 0.765 in UK Biobank, 0.791 in *All of Us*, 0.767 in MGB, and 0.818 in FHS;  
381 these respectively improved to 0.834, 0.827, 0.808, and 0.856 for AORTA Gene. The  
382 AUROC is independent of the choice of score threshold, so we also demonstrated two  
383 example thresholds: one based on the goal of being 90% sensitive for diameter  $\geq 4$ cm,  
384 and another based on a scenario where there are resources to image up to 10% of the  
385 population. In both scenarios, for all four cohorts, sensitivity and specificity were  
386 modestly improved with the incorporation of the polygenic score. Interestingly, we also  
387 observed that, compared to the comprehensive clinical score, a simpler model  
388 consisting only of age, sex, and the polygenic score performed similarly. Because such  
389 a model can be estimated for any future time from birth, this may have implications for  
390 attempts at early risk stratification before the onset of clinical risk factors. We also noted  
391 that, for the task of identifying *All of Us* participants with an EHR-based diagnosis of  
392 aneurysm, all models had attenuated performance—likely in part due to limited  
393 ascertainment of thoracic aortic disease in current clinical practice. Nevertheless, even  
394 for this task, the AORTA Gene model remained superior to the clinical score ( $P=9.5E-$   
395 10).

396  
397 We also note two limitations of the current model that point to future directions: first,  
398 despite a heritability of nearly 60%, the current polygenic score for thoracic aortic  
399 diameter derived from a GWAS of 39,524 participants added approximately 10% to the

400 variance already explained by a clinical model, suggesting that it accounted for  
401 approximately 17% of the heritability of aortic diameter. In contrast, polygenic scores for  
402 height—built from GWAS of millions of participants—are nearly saturated<sup>29</sup>. Larger  
403 GWAS sample sizes are required to increase the variance explained by polygenic  
404 estimates of ascending aortic diameter. Second, polygenic scores derived in largely  
405 European-ancestry populations do not capture the full range of human genetic diversity,  
406 limiting their utility in individuals with more diverse genetic identities<sup>30</sup>. To examine this,  
407 we evaluated 340 individuals in MGB identified as Black in the electronic health  
408 record<sup>16</sup>. In these individuals, the addition of the polygenic score did not improve the  
409 continuous estimation of aortic diameter compared to the clinical score ( $R^2$  34.8% for  
410 AORTA Gene vs 34.3% for the clinical AORTA Score), although it did nominally  
411 improve identification of individuals with diameter  $\geq 4$ cm (AUROC 0.858 vs 0.820,  
412  $P=0.04$ ). We expect a key problem from incorporating genetic data to be one of inequity  
413 due to differential accrual of benefits to individuals with European genetic identities.  
414 Larger and more diverse GWAS are required to improve genetic predictions for people  
415 across diverse genetic ancestries.

416

417 Anticipation of the relevant clinical scenario for the application of polygenic scores is  
418 important for placing the current findings into context. The cost of acquiring a targeted  
419 set of images of the ascending thoracic aorta may be comparable that of obtaining  
420 genetic information. Therefore, we expect that the value of polygenic scores for primary  
421 prevention will be realized within the context of a healthcare system that incorporates  
422 genetic information as part of the prior probability across many diseases and risk

423 factors, where the cost of one-time genotyping would be amortized over all downstream  
424 uses. In such a system, might there be a role, in principle, for the incorporation of a  
425 genetic estimator of thoracic aortic diameter into a comprehensive model to identify  
426 people who are likely to have ascending aortic enlargement? The results from the  
427 present analysis suggest so.

## 428 **Limitations**

429 While all participants were incorporated into analyses without exclusion for race,  
430 ethnicity, or ancestry, the participants in UK Biobank, MGB, FHS, and *All of Us* with  
431 thoracic imaging predominantly had genetic identities similar to that of Europeans. None  
432 of the models described in this manuscript are anticipated to be effective for identifying  
433 individuals with aortic enlargement driven by rare pathogenic variants, which are not  
434 captured in polygenic scores constructed from common variants. The models were  
435 derived and tested in individuals over the age of 40 years. The attenuation in variance  
436 explained in the external cohorts compared to UK Biobank may be, in part, a  
437 consequence of cryptic relatedness causing overfitting to the UK Biobank cohort;  
438 reducing this discrepancy is an area of interest for future efforts. Future efforts are also  
439 needed to understand whether aortic prediction models can improve outcomes.

## 440 **Conclusion**

441 Integrating genetic information into a validated clinical model improved estimation of  
442 ascending aortic diameter and the identification of individuals with thoracic aortic  
443 aneurysm.

## 444 Acknowledgments

445 JPP had full access to all the data in the study and takes responsibility for the integrity  
446 of the data and the accuracy of the data analysis. JPP and PTE conceived of the study.  
447 JPP conducted the genetic analyses, developed the models, validated the models, and  
448 conducted bioinformatic analyses in the UK Biobank, MGB, and *All of Us*. HL validated  
449 the models in FHS. LCW applied the polygenic score in MGB. S Koyama performed  
450 PCA in MGB. JPP and PTE wrote the paper. All other authors contributed to the  
451 analysis plan or provided critical revisions.

## 452 Sources of funding

453 Organizations that provided financial support had no role in the design and conduct of  
454 the study; collection, management, analysis, and interpretation of the data; preparation,  
455 review, or approval of the manuscript; or decision to submit the manuscript for  
456 publication.

457  
458 Dr. Pirruccello is supported by National Institutes of Health (NIH) K08HL159346. Dr. Lin  
459 is supported by the NIH grant U01AG068221. Dr. Kany is supported by the Walter-  
460 Benjamin Fellowship from the Deutsche Forschungsgemeinschaft (521832260). Dr.  
461 Raghavan is supported by the John S. LaDue Memorial Fellowship in Cardiovascular  
462 Medicine from Harvard Medical School. Dr. Benjamin is supported by NIH grants  
463 R01HL128914, R01HL092577, R01HL141434, and U54HL120163; and American Heart  
464 Association (AHA) grant 18SFRN34110082. Dr. Lindsay is supported by the Fredman  
465 Fellowship for Aortic Disease and the Toomey Fund for Aortic Dissection Research and

466 has received salary support from Bayer AG. Dr. Ellinor is supported by grants from the  
467 NIH (R01HL092577, 1R01HL157635), from the AHA Strategically Focused Research  
468 Networks (18SFRN34110082), and from the European Union (MAESTRIA 965286).

469  
470 The *All of Us* Research Program is supported by the National Institutes of Health, Office  
471 of the Director: Regional Medical Centers: 1 OT2 OD026549; 1 OT2 OD026554; 1 OT2  
472 OD026557; 1 OT2 OD026556; 1 OT2 OD026550; 1 OT2 OD 026552; 1 OT2  
473 OD026553; 1 OT2 OD026548; 1 OT2 OD026551; 1 OT2 OD026555; IAA #: AOD  
474 16037; Federally Qualified Health Centers: HHSN 263201600085U; Data and Research  
475 Center: 5 U2C OD023196; Biobank: 1 U24 OD023121; The Participant Center: U24  
476 OD023176; Participant Technology Systems Center: 1 U24 OD023163;  
477 Communications and Engagement: 3 OT2 OD023205; 3 OT2 OD023206; and  
478 Community Partners: 1 OT2 OD025277; 3 OT2 OD025315; 1 OT2 OD025337; 1 OT2  
479 OD025276. In addition, the *All of Us* Research Program would not be possible without  
480 the partnership of its participants.

481  
482 From the Framingham Heart Study of the National Heart Lung and Blood Institute of the  
483 National Institutes of Health and Boston University School of Medicine, this project has  
484 been funded in whole or in part with Federal funds from the National Heart Lung and  
485 Blood Institute, Department of Health and Human Services, under Contract No.  
486 75N92019D00031.

## 487 Disclosures

488 Dr. Ellinor has received sponsored research support from Bayer AG, IBM Health, Bristol  
489 Myers Squibb and Pfizer. Dr. Ellinor has also served on advisory boards or consulted  
490 for Bayer AG, MyoKardia and Novartis. The Broad Institute has filed for a patent on an  
491 invention from Drs. Ellinor, Lindsay, and Pirruccello related to a previous genetic risk  
492 predictor for aortic disease. Remaining authors report no disclosures.



## 493 References

- 494 1. Howard DPJ, Banerjee A, Fairhead JF, Perkins J, Silver LE, Rothwell PM, Oxford  
495 Vascular Study. Population-based study of incidence and outcome of acute aortic  
496 dissection and premorbid risk factor control: 10-year results from the Oxford  
497 Vascular Study. *Circulation*. 2013;127:2031–2037.
- 498 2. Yamaguchi T, Nakai M, Yano T, Matsuyama M, Yoshino H, Miyamoto Y, Sumita Y,  
499 Matsuda H, Inoue Y, Okita Y, Minatoya K, Ueda Y, Ogino H. Population-based  
500 incidence and outcomes of acute aortic dissection in Japan. *European Heart*  
501 *Journal Acute Cardiovascular Care*. 2021;10:701–709.
- 502 3. Kim JB, Spotnitz M, Lindsay ME, MacGillivray TE, Isselbacher EM, Sundt TM. Risk  
503 of Aortic Dissection in the Moderately Dilated Ascending Aorta. *J Am Coll Cardiol*.  
504 2016;68:1209–1219.
- 505 4. Solomon MD, Leong T, Sung SH, Lee C, Allen JG, Huh J, LaPunzina P, Lee H,  
506 Mason D, Melikian V, Pellegrini D, Scoville D, Sheikh AY, Mendoza D, Naderi S,  
507 Sheridan A, Hu X, Cirimele W, Gisslow A, Leung S, Padilla K, Bloom M, Chung J,  
508 Topic A, Vafaei P, Chang R, Miller DC, Liang DH, Go AS, Kaiser Permanente  
509 Northern California Center for Thoracic Aortic Disease. Association of Thoracic  
510 Aortic Aneurysm Size With Long-term Patient Outcomes: The KP-TAA Study.  
511 *JAMA Cardiology* [Internet]. 2022 [cited 2022 Oct 11]; Available from:  
512 <https://doi.org/10.1001/jamacardio.2022.3305>
- 513 5. Pape LA, Tsai TT, Isselbacher EM, Oh JK, O'gara PT, Evangelista A, Fattori R,  
514 Meinhardt G, Trimarchi S, Bossone E, Suzuki T, Cooper JV, Froehlich JB,  
515 Nienaber CA, Eagle KA, International Registry of Acute Aortic Dissection (IRAD)  
516 Investigators. Aortic diameter  $\geq$  5.5 cm is not a good predictor of type A aortic  
517 dissection: observations from the International Registry of Acute Aortic Dissection  
518 (IRAD). *Circulation*. 2007;116:1120–1127.
- 519 6. Isselbacher EM, Preventza O, Hamilton Black J, Augoustides JG, Beck AW, Bolen  
520 MA, Braverman AC, Bray BE, Brown-Zimmerman MM, Chen EP, Collins TJ,  
521 DeAnda A, Fanola CL, Girardi LN, Hicks CW, Hui DS, Schuyler Jones W, Kalahasti  
522 V, Kim KM, Milewicz DM, Oderich GS, Ogbechie L, Promes SB, Gyang Ross E,  
523 Schermerhorn ML, Singleton Times S, Tseng EE, Wang GJ, Woo YJ. 2022  
524 ACC/AHA Guideline for the Diagnosis and Management of Aortic Disease: A  
525 Report of the American Heart Association/American College of Cardiology Joint  
526 Committee on Clinical Practice Guidelines. *Circulation*. 2022;146:e334–e482.
- 527 7. Mori M, Gan G, Deng Y, Yousef S, Weininger G, Daggula KR, Agarwal R, Shang  
528 M, Assi R, Geirsson A, Vallabhajosyula P. Development and Validation of a  
529 Predictive Model to Identify Patients With an Ascending Thoracic Aortic Aneurysm.  
530 *Journal of the American Heart Association*. 2021;10:e022102.
- 531 8. Obel LM, Diederichsen AC, Steffensen FH, Frost L, Lambrechtsen J, Busk M,  
532 Urbonaviciene G, Egstrup K, Karon M, Rasmussen LM, Gerke O, Bovling AS,  
533 Lindholt JS. Population-Based Risk Factors for Ascending, Arch, Descending, and  
534 Abdominal Aortic Dilations for 60–74-Year-Old Individuals. *Journal of the American*  
535 *College of Cardiology*. 2021;78:201–211.
- 536 9. Pirruccello JP, Lin H, Khurshid S, Nekoui M, Weng L-C, Ramachandran VS,  
537 Isselbacher EM, Benjamin EJ, Lubitz SA, Lindsay ME, Ellinor PT. Development of  
538 a Prediction Model for Ascending Aortic Diameter Among Asymptomatic

- 539 Individuals. *JAMA*. 2022;328:1935–1944.
- 540 10. Pirruccello JP, Chaffin MD, Chou EL, Fleming SJ, Lin H, Nekoui M, Khurshid S,  
541 Friedman SF, Bick AG, Arduini A, Weng L-C, Choi SH, Akkad A-D, Batra P, Tucker  
542 NR, Hall AW, Roselli C, Benjamin EJ, Vellarikkal SK, Gupta RM, Stegmann CM,  
543 Juric D, Stone JR, Vasani RS, Ho JE, Hoffmann U, Lubitz SA, Philippakis AA,  
544 Lindsay ME, Ellinor PT. Deep learning enables genetic analysis of the human  
545 thoracic aorta. *Nat Genet*. 2021;
- 546 11. Collins GS, Reitsma JB, Altman DG, Moons KGM. Transparent Reporting of a  
547 multivariable prediction model for Individual Prognosis Or Diagnosis (TRIPOD):  
548 The TRIPOD Statement. *Annals of Internal Medicine*. 2015;162:55.
- 549 12. Collins R. UK Biobank Protocol [Internet]. 2007; Available from:  
550 <https://www.ukbiobank.ac.uk/media/gnkeyh2q/study-rationale.pdf>
- 551 13. Denny JC, Rutter J, Goldstein DB, Philippakis A, Smoller J, Jenkins G, Dishman E.  
552 The “All of Us” Research Program. *New England Journal of Medicine*.  
553 2019;381:668–676.
- 554 14. Rogers IS, Massaro JM, Truong QA, Mahabadi AA, Kriegel MF, Fox CS,  
555 Thanassoulis G, Isselbacher EM, Hoffmann U, O’Donnell CJ. Distribution,  
556 determinants, and normal reference values of thoracic and abdominal aortic  
557 diameters by computed tomography (from the Framingham Heart Study). *Am J*  
558 *Cardiol*. 2013;111:1510–1516.
- 559 15. Pirruccello JP, Rämö JT, Choi SH, Chaffin MD, Kany S, Nekoui M, Chou EL,  
560 Jurgens SJ, Friedman SF, Juric D, Stone JR, Batra P, Ng K, Philippakis AA,  
561 Lindsay ME, Ellinor PT. The Genetic Determinants of Aortic Distention. *Journal of*  
562 *the American College of Cardiology*. 2023;81:1320–1335.
- 563 16. Khurshid S, Reeder C, Harrington LX, Singh P, Sarma G, Friedman SF, Di Achille  
564 P, Diamant N, Cunningham JW, Turner AC, Lau ES, Haimovich JS, Al-Alusi MA,  
565 Wang X, Klarqvist MDR, Ashburner JM, Diedrich C, Ghadessi M, Mielke J, Eilken  
566 HM, McElhinney A, Derix A, Atlas SJ, Ellinor PT, Philippakis AA, Anderson CD, Ho  
567 JE, Batra P, Lubitz SA. Cohort design and natural language processing to reduce  
568 bias in electronic health records research. *NPJ Digit Med*. 2022;5:47.
- 569 17. Mbatchou J, Barnard L, Backman J, Marcketta A, Kosmicki JA, Ziyatdinov A,  
570 Benner C, O’Dushlaine C, Barber M, Boutkov B, Habegger L, Ferreira M, Baras A,  
571 Reid J, Abecasis G, Maxwell E, Marchini J. Computationally efficient whole-  
572 genome regression for quantitative and binary traits. *Nat Genet*. 2021;53:1097–  
573 1103.
- 574 18. Sudlow C, Gallacher J, Allen N, Beral V, Burton P, Danesh J, Downey P, Elliott P,  
575 Green J, Landray M, Liu B, Matthews P, Ong G, Pell J, Silman A, Young A,  
576 Sprosen T, Peakman T, Collins R. UK biobank: an open access resource for  
577 identifying the causes of a wide range of complex diseases of middle and old age.  
578 *PLoS medicine*. 2015;12:e1001779.
- 579 19. Bycroft C, Freeman C, Petkova D, Band G, Elliott LT, Sharp K, Motyer A, Vukcevic  
580 D, Delaneau O, O’Connell J, Cortes A, Welsh S, Young A, Effingham M, McVean  
581 G, Leslie S, Allen N, Donnelly P, Marchini J. The UK Biobank resource with deep  
582 phenotyping and genomic data. *Nature*. 2018;562:203.
- 583 20. Ge T, Chen C-Y, Ni Y, Feng Y-CA, Smoller JW. Polygenic prediction via Bayesian  
584 regression and continuous shrinkage priors. *Nature Communications*.

- 585 2019;10:1776.
- 586 21. Karlson EW, Boutin NT, Hoffnagle AG, Allen NL. Building the Partners HealthCare  
587 Biobank at Partners Personalized Medicine: Informed Consent, Return of Research  
588 Results, Recruitment Lessons and Operational Considerations. *J Pers Med*  
589 [Internet]. 2016 [cited 2020 Jul 14];6. Available from:  
590 <https://www.ncbi.nlm.nih.gov/pmc/articles/PMC4810381/>
- 591 22. Kowalski MH, Qian H, Hou Z, Rosen JD, Tapia AL, Shan Y, Jain D, Argos M,  
592 Arnett DK, Avery C, Barnes KC, Becker LC, Bien SA, Bis JC, Blangero J,  
593 Boerwinkle E, Bowden DW, Buyske S, Cai J, Cho MH, Choi SH, Choquet H,  
594 Cupples LA, Cushman M, Daya M, Vries PS de, Ellinor PT, Faraday N, Fornage M,  
595 Gabriel S, Ganesh S, Graff M, Gupta N, He J, Heckbert SR, Hidalgo B, Hodonsky  
596 C, Irvin MR, Johnson AD, Jorgenson E, Kaplan R, Kardia SL, Kelly TN,  
597 Kooperberg C, Lasky-Su JA, Loos RJJ, Lubitz SA, Mathias RA, McHugh CP,  
598 Montgomery C, Moon J-Y, Morrison AC, Palmer ND, Pankratz N, Papanicolaou  
599 GJ, Peralta JM, Peyser PA, Rich SS, Rotter JI, Silverman EK, Smith JA, Smith NL,  
600 Taylor KD, Thornton TA, Tiwari HK, Tracy RP, Wang T, Weiss ST, Weng LC,  
601 Wiggins KL, Wilson JG, Yanek LR, Zöllner S, North KN, Auer PL, Consortium NT-  
602 O for PM (TOPMed), Hematology & Topm, Group HW, Raffield LM, Reiner AP,  
603 Li Y. Use of >100,000 NHLBI Trans-Omics for Precision Medicine (TOPMed)  
604 Consortium whole genome sequences improves imputation quality and detection of  
605 rare variant associations in admixed African and Hispanic/Latino populations.  
606 *bioRxiv*. 2019;683201.
- 607 23. Altshuler DM, Gibbs RA, Peltonen L, Altshuler DM, Gibbs RA, Peltonen L,  
608 Dermitzakis E, Schaffner SF, Yu F, Peltonen L, Dermitzakis E, Bonnen PE,  
609 Altshuler DM, Gibbs RA, de Bakker PIW, Deloukas P, Gabriel SB, Gwilliam R, Hunt  
610 S, Inouye M, Jia X, Palotie A, Parkin M, Whittaker P, Yu F, Chang K, Hawes A,  
611 Lewis LR, Ren Y, Wheeler D, Gibbs RA, Marie Muzny D, Barnes C, Darvishi K,  
612 Hurles M, Korn JM, Kristiansson K, Lee C, McCarroll SA, Nemesh J, Dermitzakis  
613 E, Keinan A, Montgomery SB, Pollack S, Price AL, Soranzo N, Bonnen PE, Gibbs  
614 RA, Gonzaga-Jauregui C, Keinan A, Price AL, Yu F, Anttila V, Brodeur W, Daly MJ,  
615 Leslie S, McVean G, Moutsianas L, Nguyen H, Schaffner SF, Zhang Q, Ghorri MJR,  
616 McGinnis R, McLaren W, Pollack S, Price AL, Schaffner SF, Takeuchi F,  
617 Grossman SR, Shlyakhter I, Hostetter EB, Sabeti PC, Adebamowo CA, Foster  
618 MW, Gordon DR, Licinio J, Cristina Manca M, Marshall PA, Matsuda I, Ngare D,  
619 Ota Wang V, Reddy D, Rotimi CN, Royal CD, Sharp RR, Zeng C, Brooks LD,  
620 McEwen JE, The International HapMap 3 Consortium, Principal investigators,  
621 Project coordination leaders, Manuscript writing group, Genotyping and QC,  
622 ENCODE 3 sequencing and SNP discovery, Copy number variation typing and  
623 analysis, Population analysis, Low frequency variation analysis, Linkage  
624 disequilibrium and haplotype sharing analysis, et al. Integrating common and rare  
625 genetic variation in diverse human populations. *Nature*. 2010;467:52–58.
- 626 24. Li Y, Willer CJ, Ding J, Scheet P, Abecasis GR. MaCH: Using Sequence and  
627 Genotype Data to Estimate Haplotypes and Unobserved Genotypes. *Genet*  
628 *Epidemiol*. 2010;34:816–834.
- 629 25. Venner E, Muzny D, Smith JD, Walker K, Neben CL, Lockwood CM, Empey PE,  
630 Metcalf GA, Kachulis C, All of Us Research Program Regulatory Working Group,

- 631 Mian S, Musick A, Rehm HL, Harrison S, Gabriel S, Gibbs RA, Nickerson D, Zhou  
632 AY, Doheny K, Ozenberger B, Topper SE, Lennon NJ. Whole-genome sequencing  
633 as an investigational device for return of hereditary disease risk and  
634 pharmacogenomic results as part of the All of Us Research Program. *Genome*  
635 *Med.* 2022;14:34.
- 636 26. Lim M, Hastie T. Learning Interactions via Hierarchical Group-Lasso  
637 Regularization. *Journal of Computational and Graphical Statistics.* 2015;24:627–  
638 654.
- 639 27. DeLong ER, DeLong DM, Clarke-Pearson DL. Comparing the areas under two or  
640 more correlated receiver operating characteristic curves: a nonparametric  
641 approach. *Biometrics.* 1988;44:837–845.
- 642 28. Pencina MJ, Steyerberg EW, D’Agostino RB. Extensions of net reclassification  
643 improvement calculations to measure usefulness of new biomarkers. *Stat Med.*  
644 2011;30:11–21.
- 645 29. Yengo L, Vedantam S, Marouli E, Sidorenko J, Bartell E, Sakaue S, Graff M,  
646 Eliassen AU, Jiang Y, Raghavan S, Miao J, Arias JD, Mukamel RE, Spracklen CN,  
647 Yin X, Chen S-H, Ferreira T, Ji Y, Karedera T, Lull K, Lin K, Malden DE, Medina-  
648 Gomez C, Machado M, Moore A, Rueger S, Group GC-HW, Team 23andMe  
649 Research, Program VMV, Initiative) D (DiscovEHR and MCH, Network) eMERGE  
650 (Electronic MR and G, Study LC, Center RG, Consortium TP, Group USS,  
651 Chasman DI, Cho YS, Heid IM, McCarthy MI, Ng MCY, O’Donnell CJ, Rivadeneira  
652 F, Thorsteinsdottir U, Sun YV, Thai ES, Boehnke M, Deloukas P, Justice AE,  
653 Lindgren CM, Loos RJF, Mohlke KL, North KE, Stefansson K, Walters RG, Winkler  
654 TW, Young KL, Loh P-R, Yang J, Esko T, Assimes TL, Auton A, Abecasis GR,  
655 Willer CJ, Locke AE, Berndt SI, Lettre G, Frayling TM, Okada Y, Wood AR,  
656 Visscher PM, Hirschhorn JN. A Saturated Map of Common Genetic Variants  
657 Associated with Human Height from 5.4 Million Individuals of Diverse Ancestries  
658 [Internet]. 2022 [cited 2022 Jan 11]. Available from:  
659 <https://www.biorxiv.org/content/10.1101/2022.01.07.475305v1>
- 660 30. Gurdasani D, Carstensen T, Fatumo S, Chen G, Franklin CS, Prado-Martinez J,  
661 Bouman H, Abascal F, Haber M, Tachmazidou I, Mathieson I, Ekoru K, DeGorter  
662 MK, Nsubuga RN, Finan C, Wheeler E, Chen L, Cooper DN, Schiffels S, Chen Y,  
663 Ritchie GRS, Pollard MO, Fortune MD, Mentzer AJ, Garrison E, Bergström A,  
664 Hatzikotoulas K, Adeyemo A, Doumatey A, Elding H, Wain LV, Ehret G, Auer PL,  
665 Kooperberg CL, Reiner AP, Franceschini N, Maher D, Montgomery SB, Kadie C,  
666 Widmer C, Xue Y, Seeley J, Asiki G, Kamali A, Young EH, Pomilla C, Soranzo N,  
667 Zeggini E, Pirie F, Morris AP, Heckerman D, Tyler-Smith C, Motala AA, Rotimi C,  
668 Kaleebu P, Barroso I, Sandhu MS. Uganda Genome Resource Enables Insights  
669 into Population History and Genomic Discovery in Africa. *Cell.* 2019;179:984-  
670 1002.e36.
- 671

672

## 673 Figure Legends

### 674 **Figure 1: Study cohorts**

675 The sample diagram depicts participant subsets. UK Biobank participants with MRI data  
676 were split by random ID into a GWAS group (blue, N=39,524) and a residual group.  
677 Individuals in the residual group related within 3 degrees of kinship were removed  
678 (N=557), and the residual group was then split into a training group (purple, N=4,896)  
679 and an internal validation group (yellow, N=4,962). As depicted in the legend, the  
680 GWAS and PRS development was conducted in the GWAS group (blue, N=39,524).  
681 Clinical model development was conducted in the GWAS and training groups (blue and  
682 purple, N=44,420). The PRS was incorporated into the clinical score using a linear  
683 model to produce the AORTA Gene model in the training group (purple, N=4,896). All  
684 models were validated in the internal validation set (yellow, N=4,962) and the external  
685 validation sets (orange): MGB, FHS, and *All of Us*. MGB: Mass General Brigham  
686 Biobank. FHS: Framingham Heart Study. MRI: magnetic resonance imaging. GWAS:  
687 genome-wide association study.

### 688 **Figure 2: Score calibration curves in the UK Biobank validation set**

689 Counterclockwise from top left: AORTA Gene, followed by the clinical AORTA Score,  
690 the age and sex model, and the age/sex/genetics model. The x axis represents the  
691 predicted ascending aortic diameter; the y axis represents the measured ascending  
692 aortic diameter; both are truncated at the same points so that the x and y axes have the  
693 same span. Each point represents one of the 4,962 UK Biobank internal validation set  
694 participants; orange points represent women while navy points represent men. The blue

695 line shows the smoothed average value, and only extends along the x axis to the limits  
696 of the observed data. The black line shows the line of ideal calibration, where a 1 cm  
697 greater score would be met by a 1 cm greater aortic diameter. For all plotted scores, the  
698 slopes were statistically indistinguishable from one and the intercepts were statistically  
699 indistinguishable from zero as detailed in the Results.

### 700 **Figure 3: Variance in aortic diameter explained by the models**

701 For each cohort, the variance in ascending aortic diameter explained by the model  
702 derived from age and sex (navy blue), the clinical model (AORTA Score, slate gray),  
703 and the clinical model incorporating the polygenic score (AORTA Gene, orange) is  
704 depicted for the internal validation set and the three external validation sets. MGB: Mass  
705 General Brigham Biobank. FHS: Framingham Heart Study.

### 706 **Figure 4: Receiver operator characteristic curves**

707 Receiver operator characteristic (ROC) curves for the AORTA Gene model (red) and the clinical  
708 AORTA Score model (blue) in the validation cohorts. The dashed diagonal line represents the  
709 no-information baseline. Counterclockwise from top left: UK Biobank internal validation, MGB,  
710 FHS, and *All of Us*. The AUROC for detecting aortic diameter  $\geq 4$ cm for the AORTA Gene model  
711 in these cohorts was, respectively, 0.834, 0.808, 0.856, and 0.827. The respective AUROC for  
712 the clinical AORTA Score was 0.765, 0.767, 0.818, and 0.791. MGB: Mass General Brigham  
713 Biobank. FHS: Framingham Heart Study.

714 Tables

715 **Table 1: Participant characteristics**

|                                        | UK Biobank MRI Training | UK Biobank MRI Internal Validation | MGB TTE External Validation | FHS CT External Validation | All of Us TTE External Validation | All of Us Aneurysm External Validation |
|----------------------------------------|-------------------------|------------------------------------|-----------------------------|----------------------------|-----------------------------------|----------------------------------------|
| <b>N</b>                               | 44,420                  | 4,962                              | 5,469                       | 1,298                      | 610                               | 164,789                                |
| <b>Men</b>                             | 21,053 (47.4%)          | 2,344 (47.2%)                      | 2,580 (47.2%)               | 617 (47.5%)                | 246 (40.3%)                       | 70,861 (43.0%)                         |
| <b>Women</b>                           | 23,367 (52.6%)          | 2,618 (52.8%)                      | 2,889 (52.8%)               | 681 (52.5%)                | 364 (59.7%)                       | 93,928 (57.0%)                         |
| <b>Age (years)</b>                     | 65.2 (7.7)              | 65.4 (7.7)                         | 61.1 (14.4)                 | 59.8 (9.0)                 | 66.1 (11.0)                       | 60.3 (10.9)                            |
| <b>Medical history</b>                 |                         |                                    |                             |                            |                                   |                                        |
| Hypertension                           | 13,299 (29.9%)          | 1,501 (30.2%)                      | 4,535 (82.9%)               | 532 (41.0%)                | 426 (69.8%)                       | 57,845 (35.1%)                         |
| Hyperlipidemia                         | 9,644 (21.7%)           | 1,103 (22.2%)                      | 942 (17.2%)                 | 257 (19.8%)                | 155 (25.4%)                       | 6,379 (3.9%)                           |
| Diabetes                               | 1,277 (2.9%)            | 160 (3.2%)                         | 1,750 (32.0%)               | 115 (8.9%)                 | 210 (34.4%)                       | 25,568 (15.5%)                         |
| <b>Heart rate (bpm)</b>                | 68 (11)                 | 68 (11)                            | 76 (15)                     | 65 (11)                    | 69 (11)                           | 72 (12)                                |
| <b>Systolic blood pressure (mmHg)</b>  | 140 (18)                | 141 (18)                           | 128 (17)                    | 126 (18)                   | 129 (18)                          | 129 (18)                               |
| <b>Diastolic blood pressure (mmHg)</b> | 79 (10)                 | 79 (10)                            | 75 (10)                     | 75 (9)                     | 77 (11)                           | 78 (11)                                |
| <b>Height (cm)</b>                     | 169 (9)                 | 169 (9)                            | 169 (10)                    | 168 (9)                    | 166 (10)                          | 168 (10)                               |
| <b>Weight (kg)</b>                     | 75.2 (14.7)             | 75.4 (14.9)                        | 84.4 (21.2)                 | 80 (17.3)                  | 88.9 (24.9)                       | 84.5 (21.8)                            |
| <b>BMI (kg/m<sup>2</sup>)</b>          | 26.3 (4.2)              | 26.3 (4.3)                         | 29.5 (6.6)                  | 28.3 (5.2)                 | 32.0 (8.4)                        | 30.0 (7.3)                             |
| <b>Ascending aortic diameter (cm)</b>  | 3.18 (0.35)             | 3.19 (0.35)                        | 3.20 (0.48)                 | 3.45 (0.36)                | 3.34 (0.45)                       | NA                                     |
| <b>Aortic diameter ≥4cm</b>            | 1,040 (2.3%)            | 113 (2.3%)                         | 335 (6.1%)                  | 116 (8.9%)                 | 65 (10.7%)                        | NA                                     |
| <b>Prevalent aneurysm</b>              | NA                      | NA                                 | NA                          | NA                         | NA                                | 1,904 (1.2%)                           |
| <b>Incident aneurysm</b>               | NA                      | NA                                 | NA                          | NA                         | NA                                | 1,632 (1.0%)                           |

716 All values are mean (standard deviation) or count (percent of total). BPM: beats per  
 717 minute. MGB: Mass General Brigham. BMI: body mass index. MRI: magnetic resonance  
 718 imaging. CT: computed tomography. TTE: transthoracic echocardiography.

## Figures

**Figure 1: Study cohorts**

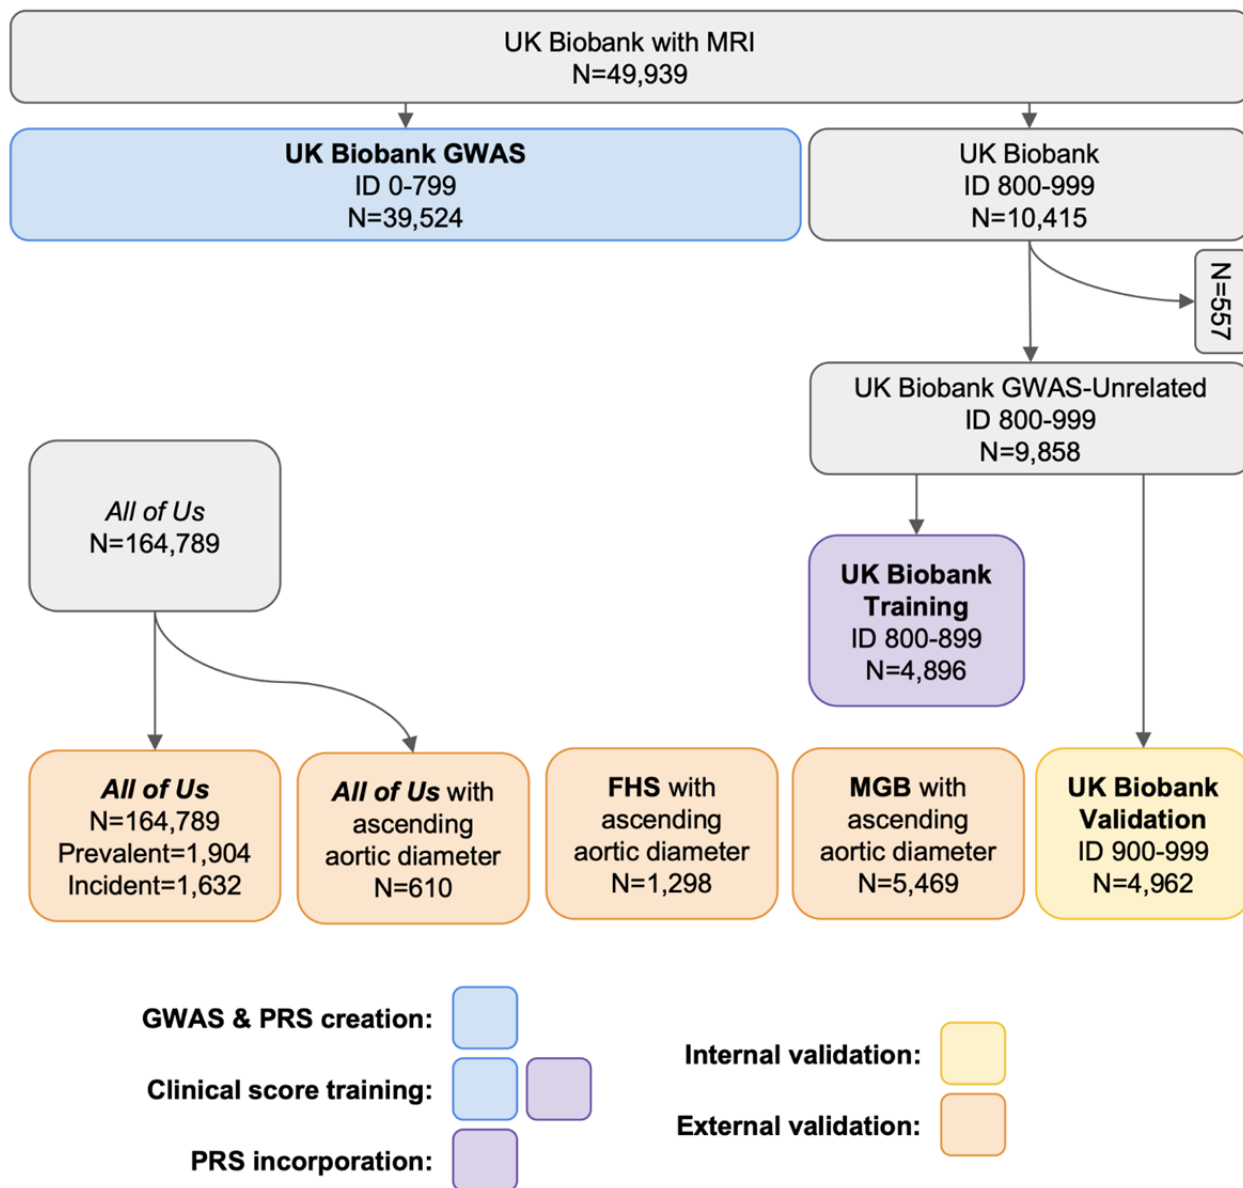



**Figure 2: Score calibration curves in the UK Biobank validation set**

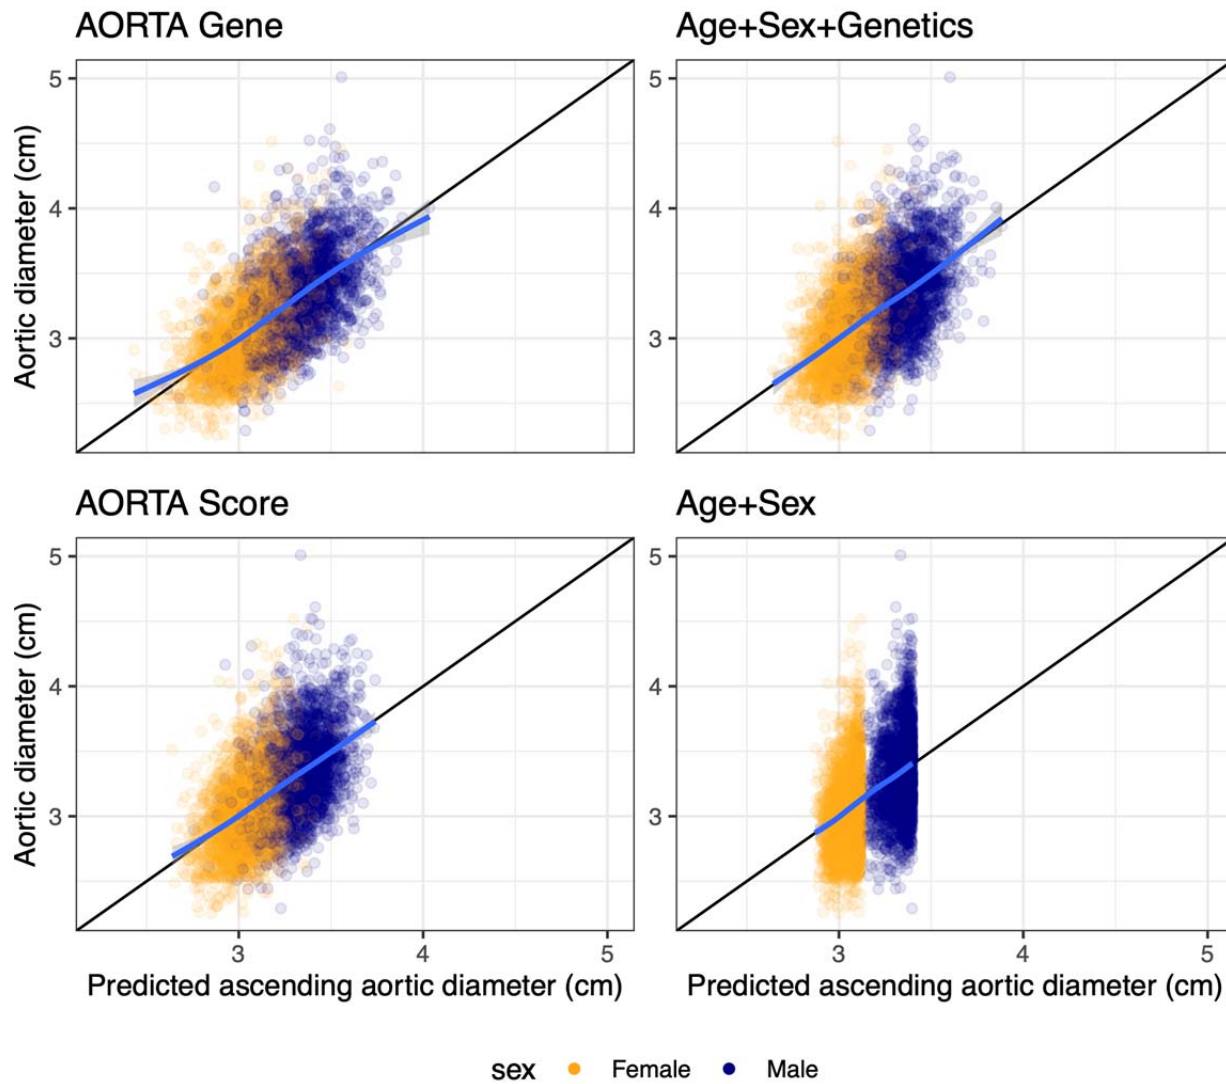

**Figure 3: Variance in aortic diameter explained by the models**

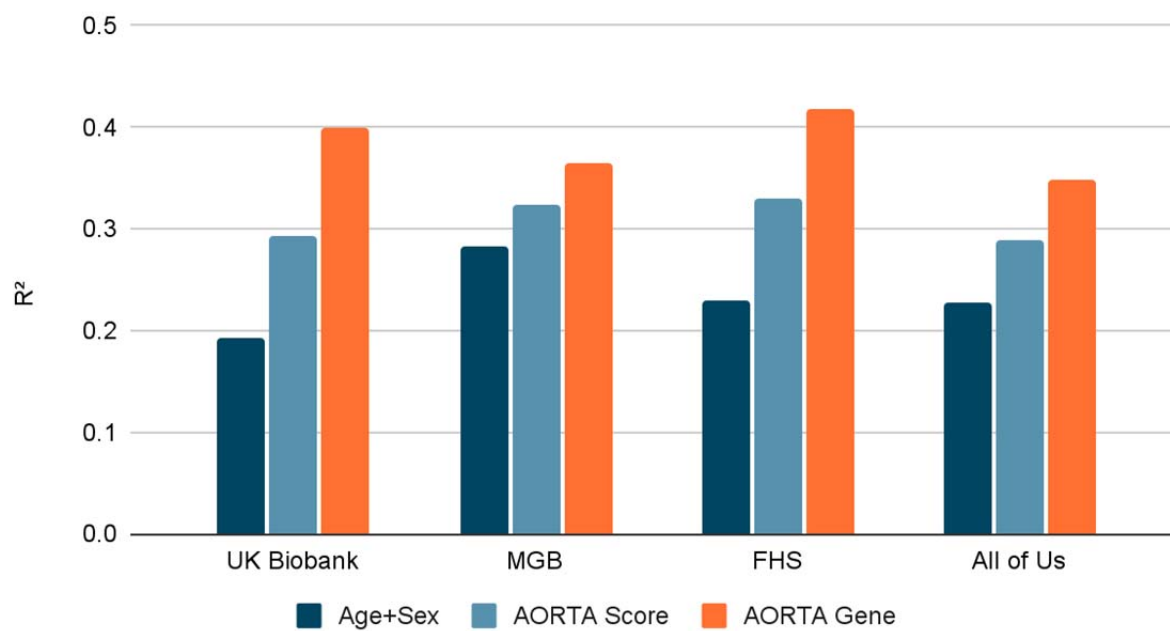

**Figure 4: Receiver operator characteristic curves**

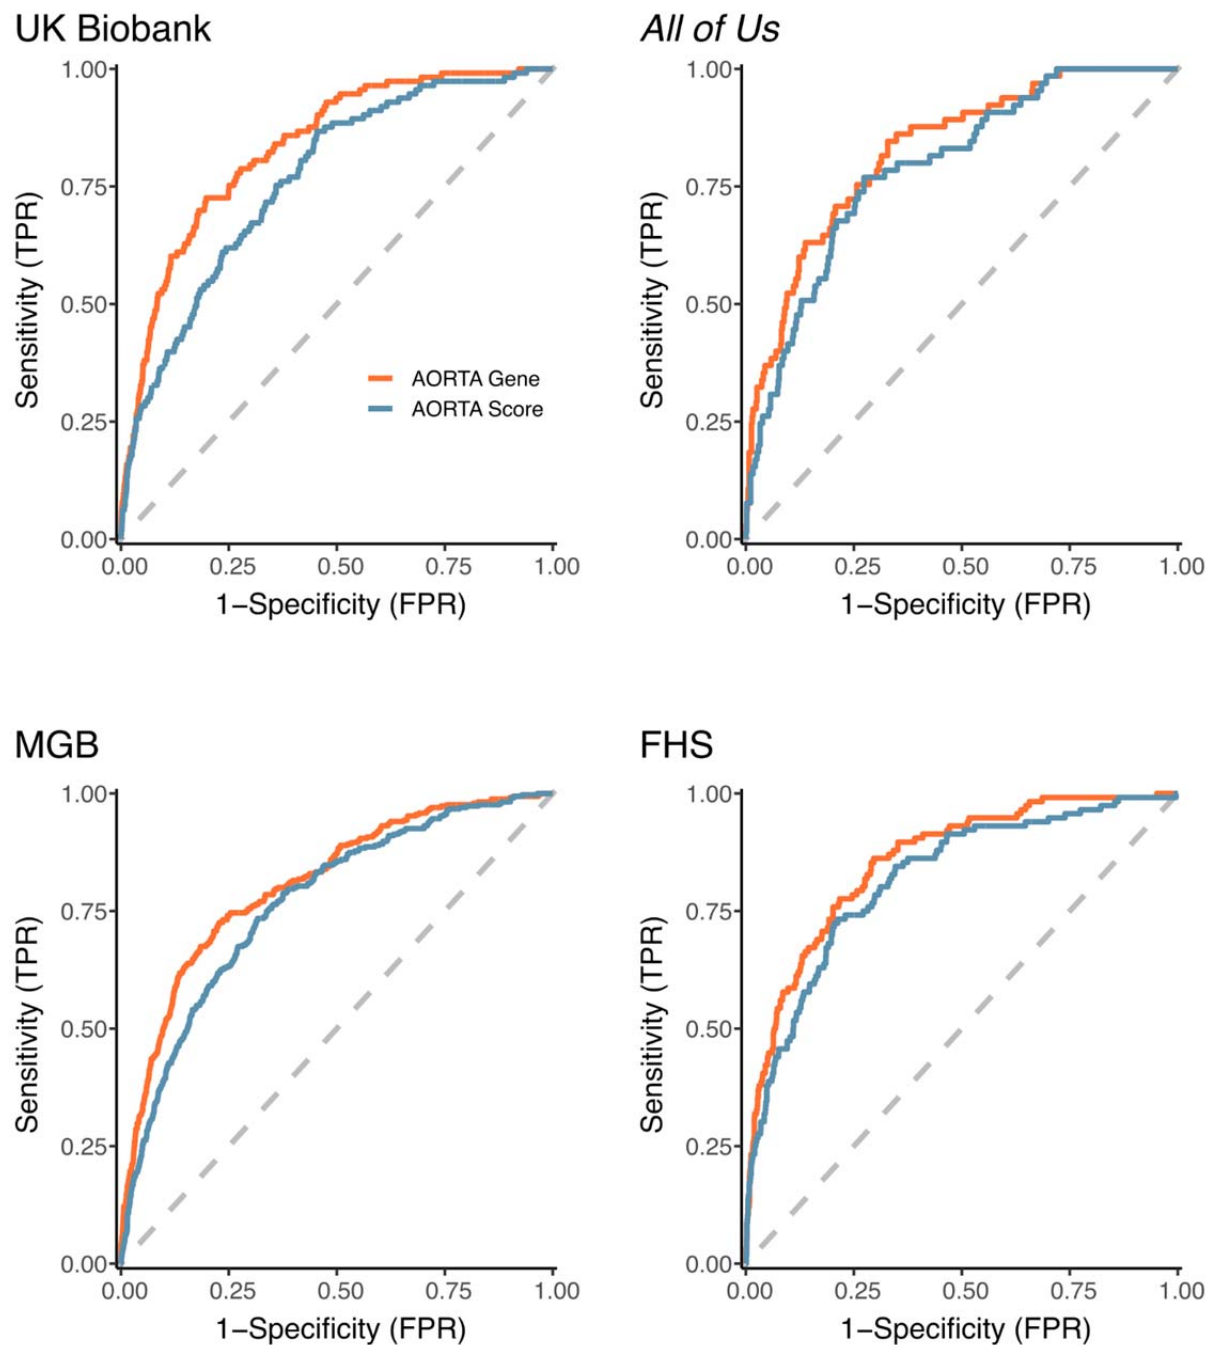

Source: https://medrxiv.org/content/10.1101/2023.08.23.23294513v1.full.pdf
